# Supplementary material
Source: PubMed Central journal article supplement (PMC5498257)
Supplement: supp_5.2.E281_Original-submission-20160104.pdf [file supp_5.2.E281_Original-submission-20160104.pdf]

1  
2  
3 A Population Based Analysis of the Impact of a Provincial Quality Improvement  
4 Program on Primary Health Care in Ontario.  
5  
6

7 Michael E. Green, MD, MPH  
8 Associate Professor  
9 Depts. of Family Medicine and Public Health Sciences  
10 Centre for Health Services and Policy Research  
11 Centre for Studies in Primary Care  
12 Institute for Clinical Evaluative Sciences  
13 Queen's University, Kingston, Ontario  
14  
15

16 Stewart B. Harris, CM, MD, MPH, FCFP, FACPM  
17 Professor  
18 Dept. of Family Medicine  
19 Centre for Studies in Family Medicine  
20 Western University, London, Ontario  
21  
22

23 Susan Webster-Bogaert, MA  
24 Centre for Studies in Family Medicine  
25 Western University, London, Ontario  
26  
27

28 Han Han, PhD  
29 Dept of Family Medicine  
30 Centre for Studies in Primary Care  
31 Queen's University, Kingston, Ontario  
32  
33

34 Jyoti Kotecha, MPA, MRSC CChem  
35 Dept of Family Medicine  
36 Centre for Studies in Primary Care  
37 Queen's University, Kingston, Ontario  
38  
39

40 Alexander Kopp, BA  
41 Institute for Clinical Evaluative Sciences, Toronto, Ontario  
42  
43

44 Minnie M. Ho, MHSc  
45 Institute for Clinical Evaluative Sciences, Toronto, Ontario  
46  
47

48 Richard V. Birtwhistle  
49 Professor  
50 Dept of Family Medicine and Public Health Sciences  
51 Centre for Studies in Primary Care  
52 Queen's University, Kingston, Ontario  
53  
54

55 Richard H. Glazier, MD, MPH, CCFP, FCFP  
56 Professor  
57 Dept of Family and Community Medicine  
58  
59  
60

1  
2  
3  
4  
5  
6  
7  
8  
9  
10  
11  
12  
13  
14  
15  
16  
17  
18  
19  
20  
21  
22  
23  
24  
25  
26  
27  
28  
29  
30  
31  
32  
33  
34  
35  
36  
37  
38  
39  
40  
41  
42  
43  
44  
45  
46  
47  
48  
49  
50  
51  
52  
53  
54  
55  
56  
57  
58  
59  
60

University of Toronto, Toronto, Ontario  
St. Michael's Hospital, Toronto, Ontario  
Institute for Clinical Evaluative Sciences, Toronto, Ontario

Correspondence to: Dr. Michael E. Green, [michael.green@dfm.queensu.ca](mailto:michael.green@dfm.queensu.ca)

Funding: Health Quality Ontario, CIHR

Prior Presentations:

Health Services Research Association of Australia and New Zealand BiAnnual  
Conference, Melbourne, Australia, Dec . 7, 2015

Canadian Association for Health Services and Policy Research Meeting, Montreal  
Quebec May 2016.

Word Count: 2639

Figures: 1

Tables: 5

Confidential

## Abstract

## Background

In Ontario, Canada, a province wide CQI initiative modeled on the IHI's breakthrough series methodology was implemented to support improved outcomes in Family Health Teams, a care model that includes many features of the Patient Centred Medical Home. We report on a population based evaluation of the impact of this program on diabetes care, cancer screening and health care utilization.

## Methods

We used comprehensive linked administrative datasets to conduct a population based controlled before and after study. Outcome measures included diabetes process of care measures (test ordering, screening for retinopathy, medication prescribing and diabetes specific chronic disease management billings), colorectal and cervical cancer screening and health care utilization (emergency room visits, ambulatory care sensitive hospitalizations, specialist visits and continuity of care).

## Results

We identified 78,192 patients from 53 intervention physicians and 1.66 million patients from 1178 control physicians. Diabetes process of care measures improved more in the intervention group than in the controls: HbA1C up to date 4.3% more ( $p=0.006$ ), retinal screening 2.5% more ( $p=0.005$ ), and diabetes preventive care visits 8.9% more ( $p=0.004$ ). Medication prescribing also improved for use of statins (3.4% more,  $p=0.01$ ), and use of ACE/ARB (4.1% more,  $p<0.001$ ). Colorectal cancer screening improved

1  
2  
3 5.4% more ( $p < 0.001$ ), and cervical cancer screening improved 2.7% more ( $p = 0.004$ ).  
4

5  
6 There were no significant differences in any of the healthcare utilization outcomes.  
7

8  
9 **Discussion**

10  
11 This large controlled evaluation of a broadly implemented CQI initiative showed  
12  
13 improvement for diabetes process of care and cancer screening outcomes, but not for  
14  
15 proxy measures of access related to healthcare utilization.  
16  
17  
18  
19  
20  
21  
22  
23  
24  
25  
26  
27  
28  
29  
30  
31  
32  
33  
34  
35  
36  
37  
38  
39  
40  
41  
42  
43  
44  
45  
46  
47  
48  
49  
50  
51  
52  
53  
54  
55  
56  
57  
58  
59  
60

Confidential

## Background:

Primary healthcare plays a key role in healthcare systems in Canada and around the world<sup>[1, 2]</sup>. Studies consistently show that the vast majority of care is delivered in primary care settings<sup>[3-7]</sup> and that strong primary care systems are associated with improved outcomes and decreased healthcare costs<sup>[5, 8, 9]</sup>. In Ontario, primary care is the backbone of the publically funded healthcare system, delivering about 80% of all visits annually<sup>[7, 10]</sup>. Improving and strengthening primary healthcare has been a key priority of successive governments in Ontario over the past decade which have implemented a series of reforms and initiatives in this key sector<sup>[10]</sup>. These include changes to payment models for physicians, support for multidisciplinary teams, support for the adoption of electronic health records and province wide quality improvement initiatives<sup>[8, 11, 12]</sup>. Family Health Teams (FHTs) represent the most highly reformed models of primary healthcare in Ontario and include all of the elements described above<sup>[13]</sup>.

There is also consistent evidence that there is room for improvement in the quality of primary health care delivery in Canada and in Ontario. The much cited Commonwealth Fund survey on primary health care quality shows that Canada's performance, last or next to last on many measures, leaves much to be desired<sup>[14]</sup>. Recent studies comparing aspects of the new payment and organizational models in Ontario have either shown modest improvements or no differences between models, but have shown improvement in quality of care over time<sup>[15-20]</sup>.

1  
2  
3  
4  
5  
6  
7  
8  
9  
10  
11  
12  
13  
14  
15  
16  
17  
18  
19  
20  
21  
22  
23  
24  
25  
26  
27  
28  
29  
30  
31  
32  
33  
34  
35  
36  
37  
38  
39  
40  
41  
42  
43  
44  
45  
46  
47  
48  
49  
50  
51  
52  
53  
54  
55  
56  
57  
58  
59  
60

In order to help maximize the impact of the new models, a provincial quality improvement initiative, the Quality Improvement and Innovation Partnership (QIIP) (subsequently incorporated into Health Quality Ontario) was created to assist FHTs in three targeted areas: diabetes management, access to care and colorectal cancer screening, through a learning collaboratives (LC) program based on the Institute for Healthcare Improvement model <sup>[21-23]</sup>. Quality improvement (QI) teams in primary care practices were provided with training on QI and the Chronic Care Model as described by Wagner and others <sup>[10, 24]</sup>, and professional practice facilitation and participated in learning sessions with other teams.

Tricco et al <sup>[25]</sup> conducted a systematic review and meta-analysis of any approach to quality improvement for diabetes management. Within their selected studies only 4 cluster randomized trials were classified as “continuous quality improvement” which was the closest match for the learning collaborative model in their taxonomy of interventions. They did not find any significant improvement in any process of care measures for this approach. Schouten et al <sup>[26]</sup> conducted a systematic review of quality improvement collaboratives and concluded that while there is some evidence that this approach can be effective, further evaluation, particularly with controlled study designs is warranted, as outcome improvements in prior studies have been modest and not always consistent or predictable. Of the controlled studies included in the Schouten et al. review, only Benedetti’s single clinic study on diabetes reported on any of the outcomes targeted by the QIIP program <sup>[27]</sup>. The QIIP program and the overall results of a comprehensive mixed-methods evaluation are described in detail elsewhere <sup>[23, 28]</sup>. The mixed methods evaluation did not find statistically significant differences in the primary outcomes. This

1  
2  
3 paper reports on a supplementary analysis of administrative data that was conducted to  
4  
5 explore the population level impact of the QIIP LC program on outcomes that could be  
6  
7 assessed with administrative data.  
8  
9

## 10 11 **Methods:**

### 12 13 *Participants and Setting*

14  
15  
16  
17  
18 All patients of physicians included in the study during the study period were  
19  
20 included in the study population. Patients were assigned to physicians if they had  
21  
22 formally enrolled as a patient with the physician or using an established method of  
23  
24 assigning patients to the physician who delivered the majority of a basket of primary care  
25  
26 services<sup>[19,20,29]</sup>. All FHT physicians in Ontario with at least 100 patients during the study  
27  
28 follow up period (Nov 2009-Feb 2013) were included in the study. Physicians who had  
29  
30 participated in the QIIP LC program were requested to provide their registration number  
31  
32 and consent to use this to identify their data within the health administrative data. Those  
33  
34 physicians who agreed comprise the intervention group. Privacy limitations meant that  
35  
36 we were unable to determine which QIIP LC participants had not consented, so all non-  
37  
38 consenting eligible physicians made up the control group. Therefore the comparator  
39  
40 group includes physicians who participated in the QIIP program but did not consent for  
41  
42 this component of the evaluation.  
43  
44  
45  
46  
47  
48  
49  
50  
51

### 52 53 *Design and Data Sources*

1  
2  
3  
4  
5  
6  
7  
8  
9  
10  
11  
12  
13  
14  
15  
16  
17  
18  
19  
20  
21  
22  
23  
24  
25  
26  
27  
28  
29  
30  
31  
32  
33  
34  
35  
36  
37  
38  
39  
40  
41  
42  
43  
44  
45  
46  
47  
48  
49  
50

Administrative datasets were linked using unique, encoded identifiers and analyzed at the Institute for Clinical Evaluative Sciences (ICES) to measure the impact of the quality improvement program on the management of diabetes, cancer screening, and utilization of healthcare services. The datasets included payments to physicians from the Ontario Health Insurance Plan, the hospital Discharge Abstracts Database, the National Ambulatory Care Reporting System (for emergency room visits), laboratory and diagnostic imaging ordering data, the Ontario Cancer Registry, the Ontario Drug Benefit database, physician workforce data, data on primary care enrollment model attachments, the registered persons data base, the census and vital statistics. A controlled pre-post study design was used. All datasets are linked at the individual level using an anonymized key number. The control and intervention groups are described above under participants. As the QIIP LC occurred in 3 waves between 2008-2010 control physicians were randomly assigned index dates corresponding to these waves. Cross-sectional and longitudinal data were generated that included physician and practice demographics including case mix, health status of the practice population, patterns of health service utilization, and chronic disease prevention and management measures. Longitudinal data were used to evaluate outcomes and cross sectional data used to present comparisons between the QIIP and comparator patients and physicians. Data definitions and sources for each of the measures used in this paper are in alignment with the ICES' Primary Care in Ontario: ICES Atlas (2006).<sup>[29]</sup>

### 51 52 53 54 *Statistical Analysis*

55  
56  
57  
58  
59  
60

Analyses compared baseline (12/24 months prior to the LC) with the post LC (12/24 months post LC) using generalized linear regression with adjustment made for the



1  
2  
3 baseline value, patient demographics (age, sex, rurality), and case mix. All analysis was  
4  
5 conducted using SAS 13.1 [30]. We conducted the analysis at the level of the physician  
6  
7 practice as that is where the intervention was targeted.  
8  
9

### 10 11 *Ethics*

12  
13  
14 This study was approved by the research ethics boards at Sunnybrook Hospital  
15  
16 (ICES Central), Western University and Queen's University in Canada.  
17  
18

### 19 20 **Results:**

21  
22 A total of 118 LC physicians practicing in FHTs were approached. The  
23  
24 recruitment rate was 53.4% (63/118). Ten physicians were subsequently found to be  
25  
26 ineligible and removed from the study. Figure 1 summarizes the steps in establishing the  
27  
28 intervention group.  
29  
30  
31

32  
33 There were 1178 control physicians with at least 100 patients who were identified  
34  
35 and randomly assigned to one of the 3 index dates. Table 1 presents the demographic data  
36  
37 for the QIIP and control physicians. QIIP physicians were slightly more likely to be  
38  
39 male, Canadian trained, and from rural areas.  
40  
41  
42

43  
44 A detailed comparison between the patients of the two groups on a range of  
45  
46 demographic and clinical characteristics shows no clinically relevant differences other  
47  
48 than a higher portion in the QIIP group residing in a rural location (18.1% vs 5.1% -  
49  
50 Table 2).  
51  
52

53  
54 Table 3 present the results for diabetes process of care measures including test  
55  
56 ordering, completion of diabetes specific billing items and medications dispensed for  
57  
58  
59  
60

1  
2  
3 eligible patients. Process of care measures improved more in the intervention group than  
4  
5 the control group: HbA1C (2 tests in 12 months) 4.3% more ( $p=0.006$ ), retinal exams  
6  
7 2.5% more ( $p=0.005$ ). The differential increase in the completion of lipid testing was not  
8  
9 significant at 1.3% ( $p=0.466$ ). Diabetes management specific billing items also improved  
10  
11 more in the intervention group: 8.8% more ( $p<0.001$ ) for flowsheet completions and  
12  
13 8.9% more ( $p=0.004$ ) for diabetes preventive care visits. Differential increases in  
14  
15 medication prescribing were noted for statins (3.4% more,  $p=0.011$ ) and use of  
16  
17 Angiotensin Converting Enzyme inhibitors and Angiotensin Receptor Blockers (4.1%  
18  
19 more,  $p<0.001$ ). There were no significant differences in the use of oral hypoglycemic  
20  
21 agents or insulin.  
22  
23  
24  
25  
26  
27

28 Table 4 presents the findings for colorectal and cervical cancer screening.  
29  
30 Screening for colorectal cancer increased more in the intervention group than in controls:  
31  
32 fecal occult blood testing (FOBT) 11.1% vs 3.3% ( $P<0.001$ ), any screening 9.9% vs 4.8%  
33  
34 ( $p<0.001$ ). There was a very small but statistically significant increase in cervical cancer  
35  
36 screening being up to date over both 2 (1.8% increase vs 0.9% decrease,  $p=0.015$ ) and 3  
37  
38 year periods (2.9% increase vs 0.2% decrease,  $p=0.004$ ). Both screening intervals were  
39  
40 considered due to changes in practice guidelines over the study period.  
41  
42  
43  
44

45 Table 5 presents data on health services utilization including emergency room  
46  
47 visits, ambulatory care sensitive condition (ACSC) hospital admissions, admission rates  
48  
49 for selected chronic diseases, and readmission rates to hospital. There were no significant  
50  
51 changes in emergency room use, hospital admissions for ACSCs or hospital  
52  
53 readmissions, with the exception of admissions for chronic obstructive pulmonary disease  
54  
55 (COPD) which had a very small but statistically significant increase in the intervention  
56  
57  
58  
59  
60

1  
2  
3 group (2.2/10,000 vs a decrease of 0.2/10,000  $p=0.021$ ). We also assessed continuity of  
4  
5 care with the primary care physicians. Usual provider continuity (UPC) was similar at  
6  
7 baseline (72.2% for the QIIP group vs 72.0% for the control group) and there were no  
8  
9 significant changes over the study period (increase of 0.7% vs decrease of 0.3%,  
10  
11  $p=0.511$ ).  
12  
13

### 14 15 16 **Interpretation:**

### 17 18 19 **Main Findings and Comparison to Other Studies**

20  
21  
22 For most of the measures that were targeted by the QIIP LC process, outcomes  
23  
24 were improved compared to controls, with rates of change about double those in the  
25  
26 control group. These differences were statistically significant due to the relatively large  
27  
28 sample sizes that are made possible by population based analyses, but were in general  
29  
30 modest in magnitude (absolute differences between 2% and 11%). It should be noted,  
31  
32 however, that even small changes can be important if they are broadly applied to the  
33  
34 population so those that are in the former group have the potential to provide system or  
35  
36 population level benefits despite their modest impact.  
37  
38  
39

40  
41  
42 The changes in diabetes process of care measures are consistent with those noted  
43  
44 in other studies. Benedetti et al <sup>[27]</sup> found improvements in both process measures (test  
45  
46 ordering, self management plans documented) in diabetes focused learning collaboratives  
47  
48 in Washington State. Valk et al <sup>[31]</sup> compared QI programs on diabetes in the Netherland  
49  
50 and the US and also found both process and outcome (HbA1C) improvements in both  
51  
52 group. In our study the magnitude of changes (crude rate) noted in the intervention group  
53  
54 before and after participation in QIIP are similar to those noted in the uncontrolled before  
55  
56  
57  
58  
59  
60

1  
2  
3 and after evaluation of another quality improvement initiative modeled on the IHI LC  
4 model in Ontario (Partnerships for Health) which found a 9% increase in annual HbA1C  
5 testing and a 9% increase in LDL testing<sup>[32]</sup>. Our adjusted analysis taking into account  
6 temporal changes in controls shows more modest increases, highlighting the importance  
7 of including a control group.  
8  
9

10  
11  
12  
13  
14  
15  
16 In contrast to the SCOPE trial<sup>[33]</sup>, which found no significant improvement in  
17 colorectal cancer (CRC) screening for an intervention that combined learning  
18 collaboratives and on-site facilitation, this population based study shows an improvement  
19 in CRC screening comparable to other interventions such as audit and feedback noted in  
20 the Colorectal Cancer Screening in Primary Care Practice<sup>[34]</sup> and BETTER studies<sup>[35]</sup>.  
21 These results also contrast with those found in our chart audit, which failed to show a  
22 significant difference in screening rates in a small subsample of patients<sup>[28]</sup>. This  
23 highlights one of the advantages of using population level data to obtain more complete  
24 data than is feasible with resource intensive audits of patient records. We included  
25 cervical cancer screening to see if participation in the program might result in process  
26 changes that impacted cancer screening in general, and not just the targeted condition  
27 (spread). There was a statistically significant increase noted in the intervention group,  
28 but the magnitude of the difference between the interventions and controls was smaller  
29 (2.7% for cervical cancer screening vs 5.4% for CRC screening).  
30  
31  
32  
33  
34  
35  
36  
37  
38  
39  
40  
41  
42  
43  
44  
45  
46  
47  
48

49 We found no clinically relevant changes in health services utilization measures  
50 such as low acuity emergency room visits and ACSC hospitalizations that are commonly  
51 used as outcome measures or proxy measures for access to primary health care. This is  
52 consistent with the limited number of other studies that have explored the relationship  
53  
54  
55  
56  
57  
58  
59  
60

1  
2  
3 between advanced access scheduling (the focus of the QIIP LC) and health system  
4 utilization. Rose et al conducted a systematic review of advanced access scheduling in  
5 2011 and found that while most studies demonstrated improvements in time to third next  
6 available appointment and reduced no-show rates, the effects on patient satisfaction were  
7 mixed and the data on utilization was limited to very few studies<sup>[36]</sup>. Only two studies  
8 were identified in this review that reported on health care utilization and only one of  
9 these was controlled. Solberg et al<sup>[37]</sup> reported on an uncontrolled before and after study  
10 of advanced access for patients with chronic conditions and showed that despite  
11 significant improvements in access and improved continuity of care, there was very  
12 limited change in healthcare utilization, including ER visits and hospitalizations, or  
13 overall costs. Subramanian et al. conducted a controlled study of primary care clinics in  
14 Indiana that either transition to advanced access or did not<sup>[38]</sup>. This study showed no  
15 significant differences in ER and urgent care visits, hospitalizations or total outpatient  
16 visits.

### 37 **Limitations**

38  
39  
40 First, by using administrative data we were limited to collected process measures  
41 and measures of health care utilization. Secondly, as we were not permitted access to the  
42 list of all participating LC physicians due to privacy restrictions, physicians who  
43 participated in the LCs but who did not complete consent forms for this part of the  
44 evaluation were included in the control group. While this could introduce a bias towards  
45 a null result, they represent only 5% of the control group making this unlikely. This was  
46 a program implementation rather than a trial of an intervention, so the degree to which  
47 recommended processes were implemented and the way in which they were implemented  
48  
49  
50  
51  
52  
53  
54  
55  
56  
57  
58  
59  
60

1  
2  
3 likely varied significantly across the participating teams. Finally, the implementation took  
4  
5 place during a time of reform, with other changes and initiatives being implemented  
6  
7 concurrently. To mitigate against this risk we applied the controlled before and after  
8  
9 design and also limited controls to being other family health team patients, as the  
10  
11 concurrent changes would be likely to be similar in both control and intervention  
12  
13 practices. One other caveat is that this evaluation was based on a relatively limited  
14  
15 follow up period. Repeating this analysis later in time to assess for the sustainability of  
16  
17 the changes would provide important additional information about the role of the LC  
18  
19 approach in improving quality in primary care.  
20  
21  
22  
23

## 24 25 **Conclusions and Implications for Policy and Practice** 26

27  
28 This is one of the largest reported evaluations of the learning collaborative  
29  
30 approach in primary care. The overall results are positive for diabetes care and cancer  
31  
32 screening, with both clinically and statistically significant improvements in multiple  
33  
34 outcomes noted, which supports the uses of IHI LC strategy in this setting. There were no  
35  
36 improvements in healthcare utilization measures that were used as a proxy for improved  
37  
38 primary care access. This is likely because there are only weak links between real  
39  
40 improved access and these outcomes. Direct assessment of access to primary health care  
41  
42 as well as patient experience with access would be better measures of success in this  
43  
44 domain. Despite the relatively modest absolute levels of improvement noted, the success  
45  
46 in achieving improvements of this scale for large populations is important. In our setting  
47  
48 the learning collaborative approach seemed to be beneficial for outcomes that were more  
49  
50 directly in control of health care providers when applied at large scale to a broad range of  
51  
52 primary care practices. It seemed less effective in changing outcomes such as medication  
53  
54  
55  
56  
57  
58  
59  
60

1  
2  
3 use or healthcare utilization that are dependent on patient or system factors outside the  
4  
5 control of the practice.  
6  
7

8  
9 **Conflicts of Interest:**

10  
11  
12 None to declare.  
13

14  
15 **Acknowledgements:**

16  
17  
18 This study was supported by Quality Improvement and Innovation Partnership (QIIP),  
19  
20 Health Quality Ontario and a CIHR Knowledge Dissemination grant. Dr. Green is  
21  
22 supported by the CTAQ Chair in Applied Health Policy/Health Economics at Queen's  
23  
24 University. Dr. Harris is supported by the CDA Chair in Diabetes Management and the  
25  
26 McWhinney Chair for Studies in Family Medicine. Dr. Glazier is supported as a  
27  
28 Clinician Scientist in the Department of Family and Community Medicine at the  
29  
30 University of Toronto and at St. Michael's Hospital. The Institute for Clinical Evaluative  
31  
32 Sciences is supported in part by the Ministry of Health and Long Term Care of Ontario.  
33  
34 The opinions, results and conclusions reported in this paper are those of the authors and  
35  
36 are independent from the funding sources. No endorsement by Health Quality Ontario,  
37  
38 the Institute for Clinical Evaluative Sciences or the Ontario Ministry of Health and Long-  
39  
40 Term Care is intended or should be inferred. Parts of this material are based on based on  
41  
42 data and information compiled and provided by the Canadian Institutes of Health  
43  
44 Information (CIHI) or by Cancer Care Ontario (CCO). The analysis, conclusions,  
45  
46 opinions and statements reported in this paper are those of the authors and do not  
47  
48 necessarily reflect those of CIHI or CCO. No endorsement by CCO or CIHI is intended  
49  
50 or inferred.  
51  
52  
53  
54  
55  
56  
57  
58  
59  
60

1  
2  
3  
4  
5  
6  
7  
8  
9  
10  
11  
12  
13  
14  
15  
16  
17  
18  
19  
20  
21  
22  
23  
24  
25  
26  
27  
28  
29  
30  
31  
32  
33  
34  
35  
36  
37  
38  
39  
40  
41  
42  
43  
44  
45  
46  
47  
48  
49  
50  
51  
52  
53  
54  
55  
56  
57  
58  
59  
60

Confidential



## References

1. World Health Organization (WHO). *The world health report 2008. Primary health care: now more than ever*. Switzerland: 2008.
2. Schoen C, Osborn R, Huynh PT, Doty M, Peugh J, Zapert K. On the front lines of care: primary care doctors' office systems, experiences, and views in seven countries. *Health Aff (Millwood)* 2006 Nov-Dec; 25(6):w555-71.
3. White KL, Williams F, Greenberg BG. The ecology of medical care. *New England J Med* 1961; 2(265):885-92.
4. Green LA, Cifuentes M, Glasgow RE, Stange K. Redesigning primary care practice to incorporate health behavior change: prescription for health round-2 results. *Am J Prev Med* 2008; 35(5S):347-49.
5. Starfield B, Shi L, Macinko J. Contribution of primary care to health systems and health. *Milbank Quarterly* 2005; 83(3):457-502.
6. Boucai L, Zonszein J. Effects of quality improvement strategies for type 2 diabetes in Bronx, N.Y. *Clinical Diabetes* 2007; 25(4):155-59.
7. McPherson C, Kothari A, Sibbald S. *Quality improvement in primary health care in Ontario: an environmental scan and capacity map. Final report prepared for the quality improvement in primary healthcare project and primary health care system program*, 2010. Retrieved from <http://www.cqco.ca/common/pages/UserFile.aspx?fileId=250528>

- 1  
2  
3 8. O'Brien BD, Brown MG, Kephart G. Estimation of hospital costs for colorectal  
4 cancer care in Nova Scotia. *Can J Gastroenterology/Journal Canadien De*  
5  
6 *Gastroenterologie* 2001; 15(1):43-47.  
7
- 8  
9  
10 9. Friedberg MW, Hussey PS, Schneider EC. Primary care: a critical review of the  
11 evidence on quality and costs of health care. *Health Aff (Project Hope)* 2010;  
12 29(5):766-72.  
13  
14
- 15  
16  
17 10. Ministry of Health and Long-Term Care (MOHLTC). *Preventing and managing*  
18 *chronic disease: Ontario's framework*. May 2007. Available from:  
19  
20 [http://www.health.gov.on.ca/en/pro/programs/cdpm/pdf/framework\\_full.pdf](http://www.health.gov.on.ca/en/pro/programs/cdpm/pdf/framework_full.pdf);  
21  
22 accessed Nov. 2, 2014.  
23  
24
- 25  
26  
27 11. Hutchison B, Levesque JF, Strumpf E, Coyle N. Primary health care in Canada:  
28 systems in motion. *Milbank Q* 2011 Jun; 89(2):256-88.  
29
- 30  
31  
32 12. Kates N, Hutchison B, O'Brien P, Fraser B, Wheeler S, Chapman C. Framework for  
33 advancing improvement in primary care. *Healthc Pap* 2012;12(2):8-21.  
34  
35
- 36  
37 13. Rosser WW, Colwill JM, Kasperski J, Wilson L. Progress of Ontario's family health  
38 team model: A patient-centred medical home. *Ann Fam Med* 2011; 9(2): 165-71.  
39
- 40  
41 14. Health Council of Canada. How Engaged Are Canadians in their Primary Care?  
42 Results from the 2010 Commonwealth Fund International Health Policy Survey.  
43  
44 *Canadian Health Care Matters* 2011 (Bulletin 5). Toronto: Health Council of  
45  
46 Canada. Available at: [www.healthcouncilcanada.ca](http://www.healthcouncilcanada.ca).  
47  
48
- 49  
50 15. Dahrouge S, Hogg W, Russell G, Geneau R, Kristjansson E, Muldoon L, Johnston S.  
51 The comparison of models of primary care in Ontario (COMP-PC) study:  
52  
53  
54  
55  
56  
57  
58  
59  
60

- 1  
2  
3 methodology of a multifaceted cross-sectional practice-based study. *Open Med* 2009;  
4 3(3). Available at: <http://www.openmedicine.ca/article/view/218/259>  
5  
6  
7  
8 16. Collier R. Verdict still out on family health teams. *CMAJ*. 2011; 183(10):1131-32.  
9  
10 17. Jaakkimainen L, Glazier R, Barnsley J, Salkeld E, Lu H, Tu K. Waiting to see the  
11 specialist: patient and provider characteristics of wait times from primary to specialty  
12 care. *BMC Fam Practice* 2014; 15:16.  
13  
14  
15 18. Russell GM, Hogg W, Lemelin J. Integrated primary care organizations: the next step  
16 for primary care reform. *Can Fam Physicians* 2010; 56(3):216-218.  
17  
18 19. The Conference Board of Canada. *Final report: An external evaluation of the family*  
19 *health team (FHT) initiative*. 2014 Dec 17. Available at:  
20  
21 <http://www.conferenceboard.ca/e-library/abstract.aspx?did=6711>  
22  
23  
24  
25  
26  
27  
28  
29 20. Kiran T, Kopp A, Moineddin R, Glazier RH. Longitudinal evaluation of physician  
30 payment reform and team-based care for chronic disease management and prevention.  
31  
32 *CMAJ* 2015: First published September 21, 2015, doi: 10.1503/cmaj.150579  
33  
34  
35  
36 21. Institute for Healthcare Improvement (IHI). *The breakthrough series: IHI's*  
37 *collaborative model for achieving breakthrough improvement*. Boston,  
38 Massachusetts: Institute for Healthcare Improvement. 2003.  
39  
40  
41  
42  
43 22. Jones K, Piterman L. The effectiveness of the breakthrough series methodology.  
44 *Australian Journal of Primary Health*. 2008; 14(1):59-65.  
45  
46  
47  
48 23. Kotecha J, Brown JB, Han H, Harris SB, Green M, Russell G, Roberts S, Webster-  
49 Bogaert S, Birtwhistle R. Influence of a quality improvement learning collaborative  
50 program on team functioning in primary healthcare. *Fam, Syst, Health* 2015.  
51  
52 <http://dx.doi.org/10.1037/fsh0000107>  
53  
54  
55  
56  
57  
58  
59  
60

- 1  
2  
3  
4  
5  
6  
7  
8  
9  
10  
11  
12  
13  
14  
15  
16  
17  
18  
19  
20  
21  
22  
23  
24  
25  
26  
27  
28  
29  
30  
31  
32  
33  
34  
35  
36  
37  
38  
39  
40  
41  
42  
43  
44  
45  
46  
47  
48  
49  
50  
51  
52  
53  
54  
55  
56  
57  
58  
59  
60
24. Wagner EH, Austin BT, Davis C, Hindmarsh M, Schaefer J, Bonomi A. Improving chronic illness care: translating evidence into action. *Health Aff* 2001;20(6):64-78.
25. Tricco AC, Ivers NM, Grimshaw JM, Moher D, Turner L, Galipeau J, Halperin I, Vachon B, Ramsay T, Manns B, Tonelli M, Shojania K. Effectiveness of quality improvement strategies on the management of diabetes: a systematic review and meta-analysis. *Lancet* 2012; 379:2252-61.
26. Schouten MT, Hulscher MEJL, van Everdingen JE, Huisman R, Grol RPTM. Evidence for the impact of quality improvement collaborative: systematic review. *BMJ* 2008; 336:1491.
27. Benedetti R, Flock B, Pedersen S, Ahern M. Improved clinical outcomes for fee-for-service physician practices participating in a diabetes care collaborative. *Quality and Patient Safety* 2004; 30(4):187-94.
28. Harris SB, Green ME, Brown JB, Roberts S, Russell G, Fournie M, Webster-Bogaert S, Paquette-Warren J, Kotecha J, Han H, Thind A, Stewart M, Reichert S, Tompkins JW, Birtwhistle R. Impact of a quality improvement program on primary healthcare in Canada: a mixed-method evaluation. *Health Policy* 2015; 119:405-16.
29. Jaakkimainen L, Upshur REG, Klein-Geltink JE, Maaten S, Schultz SE, Leong A and Wang L Eds. Primary Care in Ontario: ICES Atlas (2006). Institute for Clinical Evaluative Sciences, Toronto, Ontario. Available at: <http://www.ices.on.ca/flip-publication/primary-care-2006/index.html>
30. SAS/STAT Software. SAS 13.1; 2013. Available at: [http://www.sas.com/en\\_za/software/analytics/stat.html](http://www.sas.com/en_za/software/analytics/stat.html)

- 1  
2  
3  
4  
5  
6  
7  
8  
9  
10  
11  
12  
13  
14  
15  
16  
17  
18  
19  
20  
21  
22  
23  
24  
25  
26  
27  
28  
29  
30  
31  
32  
33  
34  
35  
36  
37  
38  
39  
40  
41  
42  
43  
44  
45  
46  
47  
48  
49  
50  
51  
52  
53  
54  
55  
56  
57  
58  
59  
60
31. Valk GD, Renders CM, Kriegsman DMW, Newton KM, Twisk JWR, van Eijk JThM, van der Wal G, Wagner EH. Quality of care for patients with type 2 diabetes mellitus in the Netherlands and the United States: a comparison of two quality improvement programs. *Health Services Research* 2004; 39(4):709-725.
  32. Harris SB, Paquette-Warren J, Roberts S, Fournie M, Thind A, Ryan BL, Thorpe C, Terry AL, Brown JB, Stewart M, Webster-Bogaert S. Results of a mixed-methods evaluation of partnerships for health: a quality improvement initiative for diabetes care. *J Am Board Fam Med*. 2013; 26(6):711-19.
  33. Shaw EK, Obman-Strickland PA, Piasecki A, Judson SV, Ferrante JM, McDaniel RR, Nutting PA, Crabtree BF. Effects of facilitated team meetings and learning collaboratives on colorectal cancer screening rates in primary care practices: a cluster randomized trial. *Ann Fam Med* 2013;11(3):220-28
  34. Ornstein S, Nemeth LS, Jenkins RG, Nietert PJ. Colorectal cancer screening in primary care: Translating research into practice. *Medical Care* 2010; 48(10):900-6.
  35. Grunfeld E, Manca D, Moineddin R, Thorp KE, Hoch JS, Campbell-Scherer D, Meaney C, Rogers J, Beca J, Krueger P, Mamdani M. Improving chronic disease prevention and screening in primary care: results of the BETTER pragmatic cluster randomized controlled trial. *BMC Fam Practice* 2013; 14:175.
  36. Rose KD, Ross JS, Horwitz LI. Advanced access scheduling outcomes: a systematic review. *Arch Intern Med* 2011; 171(13):1150-59.
  37. Solberg LI, Maciosek MV, Sperl-Hillen JM, Crain AL, Engebretson KI, Asplin BR, OfConnor PJ. Does improved access to care affect utilization and costs for patients with chronic conditions? *AJMC* 2004; 10:717-22.

1  
2  
3 38. Subramanian U, Ackermann RT, Brizendine EJ, Saha C, Rosenman MB, Willis DR,  
4  
5 Marrero DG. Effect of advanced access scheduling on processes and intermediate  
6  
7 outcomes of diabetes care and utilization. *J Gen Intern Med* 2009; 24(3):327-33.  
8  
9  
10  
11  
12  
13  
14  
15  
16  
17  
18  
19  
20  
21  
22  
23  
24  
25  
26  
27  
28  
29  
30  
31  
32  
33  
34  
35  
36  
37  
38  
39  
40  
41  
42  
43  
44  
45  
46  
47  
48  
49  
50  
51  
52  
53  
54  
55  
56  
57  
58  
59  
60

Confidential

Figure 1. Recruitment flow chart

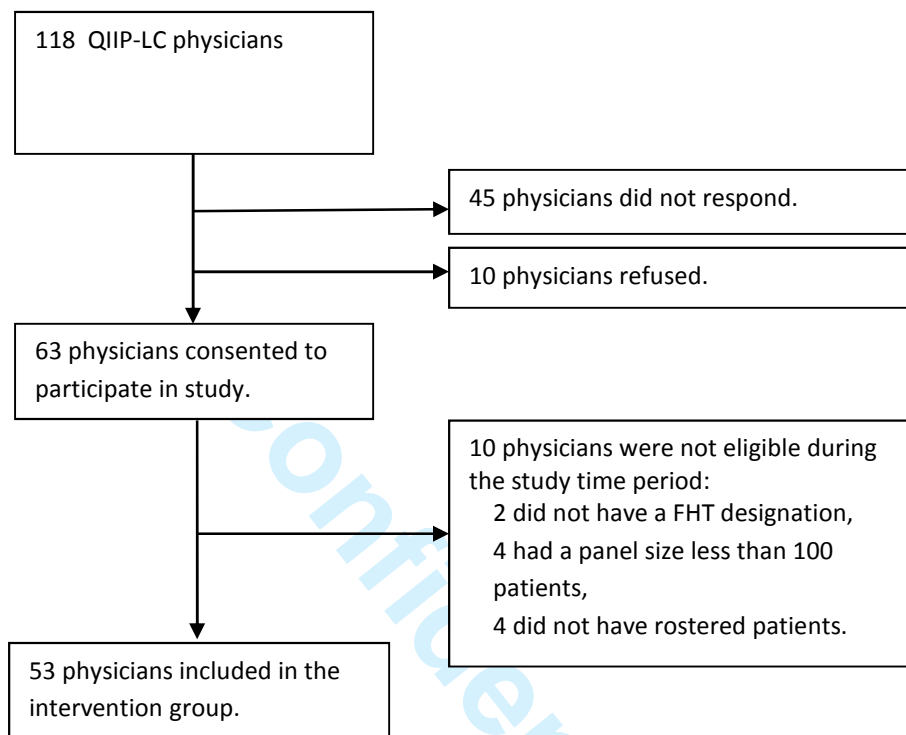

## Appendix 2 Tables

Table 1 Demographics of Physicians by QIIP and Comparator Group

|                                           | QIIP Group  |           | Comparator Group |           |
|-------------------------------------------|-------------|-----------|------------------|-----------|
|                                           | %           | N         | %                | N         |
| Physicians                                | -           | 53        | -                | 1178      |
| Sex (male)                                | 64.2        | 34        | 59.3             | 699       |
| Country of Graduation (Canada)            | 92.5        | 49        | 87.9             | 1,035     |
| Physician LHIN                            |             |           |                  |           |
| Erie St. Clair                            | 0.0         | 0         | 2.0              | 23        |
| South West                                | 5.7         | <=5       | 11.1             | 131       |
| Waterloo Wellington                       | 9.4         | <=5       | 9.0%             | 106       |
| Hamilton Niagara Haldimand Brant          | 11.3        | 6         | 14.1             | 166       |
| Central West                              | 0.0         | 0         | 1.9              | 22        |
| Mississauga Halton                        | 11.3        | 6         | 5.2              | 61        |
| Toronto Central                           | 3.8         | <=5       | 7.0              | 82        |
| Central                                   | 7.5         | <=5       | 5.4              | 64        |
| Central East                              | 0.0         | 0         | 7.2              | 85        |
| South East                                | 13.2        | 7         | 7.7              | 91        |
| Champlain                                 | 7.5         | <=5       | 7.1              | 84        |
| North Simcoe Muskoka                      | 9.4         | <=5       | 12.0             | 141       |
| North East                                | 11.3        | 6         | 6.4              | 75        |
| North West                                | 9.4         | <=5       | 4.0              | 47        |
| Physician Rurality Index of Ontario (RIO) |             |           |                  |           |
| Major Urban - 1 to 9                      | 49.1        | 26        | 54.7             | 644       |
| Suburban 10 to 39                         | 22.6        | 12        | 28.0             | 330       |
| Rural - 40+                               | 28.3        | 15        | 16.1             | 190       |
| Missing                                   | 0.0         | 0         | 1.2              | 14        |
|                                           | <b>mean</b> | <b>SD</b> | <b>mean</b>      | <b>SD</b> |
| RIO                                       | 27.00       | 30.86     | 17.95            | 23.12     |
| Age                                       | 49.85       | 8.40      | 48.27            | 9.47      |
| Years in practice (yrs since graduation)  | 22.25       | 9.87      | 24.09            | 9.12      |
| Mean number of patients                   | 1475        | -         | 1410             | -         |



Table 2 *Demographics of Patients by QIIP & Comparator Group*

|                                                      | QIIP Group  |           | Comparator Group |           |
|------------------------------------------------------|-------------|-----------|------------------|-----------|
|                                                      | %           | N         | %                | N         |
| All Patients                                         | -           | 78,192    | -                | 1,661,152 |
| Patient Sex (Male)                                   | 47.4        | 37,061    | 46.6             | 773,869   |
| Health Card Registration within 10 years of baseline | 3.5         | 2,431     | 4.8              | 70,507    |
| <b>Age</b>                                           |             |           |                  |           |
| 0-4 years                                            | 4.9         | 3,797     | 5.2              | 87,171    |
| 5-9 years                                            | 5.4         | 4,242     | 5.4              | 90,263    |
| 10-18 years                                          | 12.0        | 9,386     | 11.7             | 194,222   |
| 19-34 years                                          | 17.5        | 13,713    | 18.9             | 314,618   |
| 35-49 years                                          | 22.3        | 17,421    | 22.6             | 374,856   |
| 50-64 years                                          | 21.8        | 17,062    | 20.3             | 336,481   |
| 65-74 years                                          | 8.5         | 6,653     | 8.2              | 136,228   |
| 75-84 years                                          | 5.7         | 4,421     | 5.7              | 93,97     |
| 85 years +                                           | 1.9         | 1,497     | 2.0              | 33,336    |
| <b>Patient Rurality Index of Ontario (RIO)</b>       |             |           |                  |           |
| Major Urban (RIO 1 to 9)                             | 49.5        | 38,688    | 53.2             | 883,085   |
| 10 to 39                                             | 29.0        | 22,644    | 30.3             | 502,829   |
| Rural (RIO 40+)                                      | 18.1        | 14,148    | 5.1              | 250,538   |
| Missing                                              | 3.5         | 2,712     | 1.5              | 24,700    |
| <b>Patient Income quintile</b>                       |             |           |                  |           |
| Missing                                              | 0.7         | 520       | 0.7              | 520       |
| Low Income (Quintile 1)                              | 16.8        | 13,171    | 17.3             | 288,115   |
| Quintile 2                                           | 18.2        | 14,218    | 19.2             | 318,724   |
| Quintile 3                                           | 19.1        | 14,925    | 19.9             | 330,089   |
| Quintile 4                                           | 22.1        | 17,296    | 21.6             | 358,818   |
| High Income (Quintile 5)                             | 23.1        | 18,062    | 21.2             | 351,419   |
| <b>Diagnostic Conditions</b>                         |             |           |                  |           |
| Patients with diabetes                               | 8.0         | 6,225     | 7.8              | 129,523   |
| Patients with previous AMI*                          | 1.4         | 1,090     | 1.4              | 23,082    |
| Patients with asthma                                 | 13.5        | 10,539    | 13.4             | 223,053   |
| Patients with chronic heart failure                  | 2.0         | 1,602     | 2.0              | 32,455    |
| Patients with COPD*                                  | 7.0         | 5,462     | 6.3              | 105,023   |
| Patients with hypertension                           | 21.6        | 16,859    | 21.2             | 352,751   |
| Patients with mental health diagnoses                | 19.6        | 15,295    | 19.0             | 316,221   |
| <b>Adjusted Diagnosis Groups (ADG)</b>               |             |           |                  |           |
| 0                                                    | 5.8         | 4,538     | 5.7              | 94,961    |
| 1 to 5                                               | 53.5        | 41,814    | 52.4             | 871,048   |
| 6 to 9                                               | 34.5        | 26,956    | 35.4             | 587,558   |
| ≥10                                                  | 6.2         | 4,884     | 6.5              | 107,585   |
|                                                      | <b>mean</b> | <b>SD</b> | <b>mean</b>      | <b>SD</b> |
| Resource Utilization Band (RUB)                      | 2.62        | 1.10      | 2.63             | 1.10      |

\*AMI = acute myocardial infarction; COPD = chronic obstructive pulmonary disorder

Table 3 Diabetes management

|                                                                                                                                 |            | Baseline              |           | Post               |           | Adjusted Change (QIIP vs Controls) | p value |
|---------------------------------------------------------------------------------------------------------------------------------|------------|-----------------------|-----------|--------------------|-----------|------------------------------------|---------|
|                                                                                                                                 |            | 12 months prior to LC |           | 12 months after LC |           |                                    |         |
|                                                                                                                                 |            | %                     | 95% CI    | %                  | 95%CI     | %                                  |         |
| HbA1C test: $\geq 2$ past 12 months                                                                                             | QIIP       | 41.1                  | 36.0-46.3 | 51.4               | 46.6-56.3 | 4.3                                | 0.006   |
|                                                                                                                                 | Comparator | 42.7                  | 41.5-43.9 | 48.0               | 46.9-49.0 |                                    |         |
| Retinal examination: $\geq 1$ past 24 months                                                                                    | QIIP       | 72.5                  | 70.4-74.6 | 76.6               | 74.8-78.3 | 2.5                                | 0.005   |
|                                                                                                                                 | Comparator | 71.6                  | 71.1-72.1 | 73.3               | 72.8-73.7 |                                    |         |
| LDL Cholesterol test: $\geq 1$ past 12 months                                                                                   | QIIP       | 56.9                  | 50.1-63.6 | 64.0               | 57.8-70.3 | 1.3                                | 0.466   |
|                                                                                                                                 | Comparator | 59.5                  | 58.3-60.8 | 64.7               | 63.7-65.8 |                                    |         |
| Billing for Diabetes Flowsheet (K030) $\geq 1$ past year                                                                        | QIIP       | 27.6                  | 21.0-34.2 | 42.8               | 36.0-49.6 | 8.8                                | <0.001  |
|                                                                                                                                 | Comparator | 34.4                  | 32.9-35.9 | 39.0               | 37.6-40.4 |                                    |         |
| Billing for Preventative Care of Diabetes (Q040)                                                                                | QIIP       | 21.7                  | 15.5-27.9 | 39.1               | 32.0-46.3 | 8.9                                | 0.004   |
|                                                                                                                                 | Comparator | 28.8                  | 27.7-30.3 | 35.0               | 33.4-36.6 |                                    |         |
| <b>Diabetes Medication Management (Patients with type 2 diabetes over 65 years )</b>                                            |            |                       |           |                    |           |                                    |         |
| Prescribed Statin                                                                                                               | QIIP       | 66.5                  | 62.8-70.2 | 74.5               | 71.2-77.7 | 3.4                                | 0.011   |
|                                                                                                                                 | Comparator | 67.6                  | 66.8-68.5 | 71.9               | 71.2-72.6 |                                    |         |
| Prescribed ACE* or ARB**                                                                                                        | QIIP       | 74.1                  | 71.5-76.7 | 78.4               | 76.1-80.7 | 4.1                                | <0.001  |
|                                                                                                                                 | Comparator | 76.0                  | 75.3-76.7 | 75.0               | 74.4-75.6 |                                    |         |
| Oral hypoglycemic agents prescribed                                                                                             | QIIP       | 59.6                  | 56.3-62.8 | 59.2               | 56.2-62.3 | 0.8                                | 0.552   |
|                                                                                                                                 | Comparator | 58.7                  | 57.9-59.4 | 57.6               | 57.0-58.3 |                                    |         |
| Insulin Prescribed                                                                                                              | QIIP       | 17.1                  | 14.7-19.6 | 18.5               | 16.5-20.5 | -0.3                               | 0.764   |
|                                                                                                                                 | Comparator | 15.9                  | 15.4-16.4 | 17.9               | 17.4-18.4 |                                    |         |
| *Angiotensin Converting Enzyme Inhibitor                                                                                        |            |                       |           |                    |           |                                    |         |
| ** Angiotensin Receptor Blockers                                                                                                |            |                       |           |                    |           |                                    |         |
| Change estimate and p-value: Generalized linear regression adjusted for baseline value, gender, rurality, age, and co-morbidity |            |                       |           |                    |           |                                    |         |

Table 4 *Cancer screening*

|                                                                                                                                                                   |            | Baseline              |           | Post               |           | Adjusted Change<br>(QIIP vs Controls) | p value |
|-------------------------------------------------------------------------------------------------------------------------------------------------------------------|------------|-----------------------|-----------|--------------------|-----------|---------------------------------------|---------|
|                                                                                                                                                                   |            | 12 months prior to LC |           | 12 months after LC |           |                                       |         |
|                                                                                                                                                                   |            | %                     | 95%CI     | %                  | 95%CI     | %                                     |         |
| FOBT within past 2 years                                                                                                                                          | QIIP       | 41.1                  | 35.8-46.5 | 52.2               | 48.6-55.7 | 8.5                                   | <0.001  |
|                                                                                                                                                                   | Comparator | 39.5                  | 38.4-40.6 | 42.8               | 41.8-43.8 |                                       |         |
| Colonoscopy within past 5 years                                                                                                                                   | QIIP       | 24.5                  | 22.0-27.0 | 29.7               | 27.1-32.3 | 0.02                                  | 0.979   |
|                                                                                                                                                                   | Comparator | 26.6                  | 25.9-27.3 | 31.7               | 31.0-32.3 |                                       |         |
| Flex sig/barium enema                                                                                                                                             | QIIP       | 5.8                   | 4.7-6.9   | 3.8                | 3.2-4.4   | -0.03                                 | 0.359   |
|                                                                                                                                                                   | Comparator | 6.3                   | 6.1-6.6   | 4.4                | 4.2-4.6   |                                       |         |
| Any screening                                                                                                                                                     | QIIP       | 57.2                  | 53.0-61.3 | 67.1               | 64.6-69.6 | 5.4                                   | <0.001  |
|                                                                                                                                                                   | Comparator | 57.6                  | 56.8-58.5 | 62.4               | 61.7-63.0 |                                       |         |
| <b>Other cancer screening (Women's Health)</b>                                                                                                                    |            |                       |           |                    |           |                                       |         |
| Cervical cancer screening*<br>within past 2 years (%)                                                                                                             | QIIP       | 61.7                  | 57.9-65.5 | 63.5               | 60.6-66.3 | 2.3                                   | 0.015   |
|                                                                                                                                                                   | Comparator | 62.3                  | 61.5-63.1 | 61.4               | 60.6-62.2 |                                       |         |
| Cervical cancer screening*<br>within past 3 years (%)                                                                                                             | QIIP       | 72.2                  | 68.5-75.8 | 75.1               | 72.2-78.1 | 2.7                                   | 0.004   |
|                                                                                                                                                                   | Comparator | 72.9                  | 72.1-73.6 | 72.7               | 71.9-73.4 |                                       |         |
| *Papanicolaou test<br>Change estimate post vs pre for QIIP vs controls using General Linear Regression for baseline value, gender, rurality, age and co-morbidity |            |                       |           |                    |           |                                       |         |

Table 5 Hospital admissions and emergency room visits

|                                                                                                                                                                                                                  |            | Baseline<br>12 months prior to<br>LC |           | Post<br>12 months after LC |           | Adjusted<br>Change<br>(QIIP vs<br>Controls) | <i>p value</i> |
|------------------------------------------------------------------------------------------------------------------------------------------------------------------------------------------------------------------|------------|--------------------------------------|-----------|----------------------------|-----------|---------------------------------------------|----------------|
|                                                                                                                                                                                                                  |            | Rate                                 | 95%CI     | Rate                       | 95%CI     | Rate<br>Difference                          |                |
| <b>Emergency Department Visits ( per 100 patients per year )</b>                                                                                                                                                 |            |                                      |           |                            |           |                                             |                |
| CTAS 1-3                                                                                                                                                                                                         | QIIP       | 20.8                                 | 18.7-22.9 | 24.7                       | 22.4-27.0 | 0.1                                         | 0.903          |
|                                                                                                                                                                                                                  | Comparator | 22.0                                 | 21.6-22.5 | 24.9                       | 24.4-25.3 |                                             |                |
| CTAS 4-5<br>(low acuity)                                                                                                                                                                                         | QIIP       | 36.7                                 | 27.1-46.3 | 29.3                       | 21.4-37.2 | -1.0                                        | 0.358          |
|                                                                                                                                                                                                                  | Comparator | 28.8                                 | 27.3-30.2 | 24.6                       | 23.5-25.8 |                                             |                |
| <b>ACSC Hospital Admissions ( per 10,000 patients per year )</b>                                                                                                                                                 |            |                                      |           |                            |           |                                             |                |
| Overall                                                                                                                                                                                                          | QIIP       | 52.8                                 | 40.6-65.1 | 51.5                       | 41.3-61.7 | 3.0                                         | 0.497          |
|                                                                                                                                                                                                                  | Comparator | 42.7                                 | 40.6-44.8 | 42.1                       | 40.2-44.1 |                                             |                |
| Diabetes                                                                                                                                                                                                         | QIIP       | 8.0                                  | 5.2-10.8  | 8.4                        | 6.1-10.8  | 0                                           | 0.985          |
|                                                                                                                                                                                                                  | Comparator | 7.5                                  | 5.2-8.2   | 7.2                        | 6.5-7.9   |                                             |                |
| Asthma                                                                                                                                                                                                           | QIIP       | 5.0                                  | 2.7-7.3   | 2.9                        | 1.3-4.5   | -1.0                                        | 0.418          |
|                                                                                                                                                                                                                  | Comparator | 4.1                                  | 3.6-4.6   | 3.3                        | 3.0-3.7   |                                             |                |
| COPD*                                                                                                                                                                                                            | QIIP       | 25.9                                 | 17.8-34.1 | 28.1                       | 20.7-35.4 | 6.0                                         | 0.021          |
|                                                                                                                                                                                                                  | Comparator | 18.5                                 | 17.3-19.7 | 18.3                       | 17.2-19.6 |                                             |                |
| CHF**                                                                                                                                                                                                            | QIIP       | 13.9                                 | 9.1-18.7  | 12.1                       | 8.8-15.5  | -3.0                                        | 0.182          |
|                                                                                                                                                                                                                  | Comparator | 12.7                                 | 11.8-13.5 | 13.2                       | 12.3-14.1 |                                             |                |
| <b>Hospital Readmissions (% of those hospitalized)</b>                                                                                                                                                           |            |                                      |           |                            |           |                                             |                |
|                                                                                                                                                                                                                  |            | %                                    | 95%CI     | %                          | 95%CI     | %                                           |                |
| Within 30 days                                                                                                                                                                                                   | QIIP       | 5.5                                  | 4.7-6.3   | 5.5                        | 4.7-6.2   | -0.03                                       | 0.947          |
|                                                                                                                                                                                                                  | Comparator | 5.1                                  | 5.0-5.3   | 5.3                        | 5.1-5.4   |                                             |                |
| Within one year                                                                                                                                                                                                  | QIIP       | 17.0                                 | 15.4-18.7 | 17.4                       | 15.8-19.0 | 0.2                                         | 0.724          |
|                                                                                                                                                                                                                  | Comparator | 15.8                                 | 15.4-16.1 | 15.9                       | 15.6-16.3 |                                             |                |
| *COPD=chronic obstructive pulmonary disorder; ** CHF=cardiac heart failure<br>Change estimate and p-value: Generalized linear regression adjusted for baseline value,<br>gender, rurality, age, and co-morbidity |            |                                      |           |                            |           |                                             |                |

1  
2  
3  
4  
5  
6  
7  
8  
9  
10  
11  
12  
13  
14  
15  
16  
17  
18  
19  
20  
21  
22  
23  
24  
25  
26  
27  
28  
29  
30  
31  
32  
33  
34  
35  
36  
37  
38  
39  
40  
41  
42  
43  
44  
45  
46  
47  
48  
49  
50  
51  
52  
53  
54  
55  
56  
57  
58  
59  
60

Confidential

STROBE Statement—checklist of items that should be included in reports of observational studies  
Reviewed and incorporated these recommendations into the paper.

|                              | Item No | Recommendation                                                                                                                                                                                                                                                                                                                                                                                                                                                                                                                                                                                                                                                                                   |
|------------------------------|---------|--------------------------------------------------------------------------------------------------------------------------------------------------------------------------------------------------------------------------------------------------------------------------------------------------------------------------------------------------------------------------------------------------------------------------------------------------------------------------------------------------------------------------------------------------------------------------------------------------------------------------------------------------------------------------------------------------|
| <b>Title and abstract</b>    | 1       | (a) Indicate the study's design with a commonly used term in the title or the abstract<br>(b) Provide in the abstract an informative and balanced summary of what was done and what was found                                                                                                                                                                                                                                                                                                                                                                                                                                                                                                    |
| <b>Introduction</b>          |         |                                                                                                                                                                                                                                                                                                                                                                                                                                                                                                                                                                                                                                                                                                  |
| Background/rationale         | 2       | Explain the scientific background and rationale for the investigation being reported                                                                                                                                                                                                                                                                                                                                                                                                                                                                                                                                                                                                             |
| Objectives                   | 3       | State specific objectives, including any prespecified hypotheses                                                                                                                                                                                                                                                                                                                                                                                                                                                                                                                                                                                                                                 |
| <b>Methods</b>               |         |                                                                                                                                                                                                                                                                                                                                                                                                                                                                                                                                                                                                                                                                                                  |
| Study design                 | 4       | Present key elements of study design early in the paper                                                                                                                                                                                                                                                                                                                                                                                                                                                                                                                                                                                                                                          |
| Setting                      | 5       | Describe the setting, locations, and relevant dates, including periods of recruitment, exposure, follow-up, and data collection                                                                                                                                                                                                                                                                                                                                                                                                                                                                                                                                                                  |
| Participants                 | 6       | (a) <i>Cohort study</i> —Give the eligibility criteria, and the sources and methods of selection of participants. Describe methods of follow-up<br><i>Case-control study</i> —Give the eligibility criteria, and the sources and methods of case ascertainment and control selection. Give the rationale for the choice of cases and controls<br><i>Cross-sectional study</i> —Give the eligibility criteria, and the sources and methods of selection of participants<br>(b) <i>Cohort study</i> —For matched studies, give matching criteria and number of exposed and unexposed<br><i>Case-control study</i> —For matched studies, give matching criteria and the number of controls per case |
| Variables                    | 7       | Clearly define all outcomes, exposures, predictors, potential confounders, and effect modifiers. Give diagnostic criteria, if applicable                                                                                                                                                                                                                                                                                                                                                                                                                                                                                                                                                         |
| Data sources/<br>measurement | 8*      | For each variable of interest, give sources of data and details of methods of assessment (measurement). Describe comparability of assessment methods if there is more than one group                                                                                                                                                                                                                                                                                                                                                                                                                                                                                                             |
| Bias                         | 9       | Describe any efforts to address potential sources of bias                                                                                                                                                                                                                                                                                                                                                                                                                                                                                                                                                                                                                                        |
| Study size                   | 10      | Explain how the study size was arrived at                                                                                                                                                                                                                                                                                                                                                                                                                                                                                                                                                                                                                                                        |
| Quantitative variables       | 11      | Explain how quantitative variables were handled in the analyses. If applicable, describe which groupings were chosen and why                                                                                                                                                                                                                                                                                                                                                                                                                                                                                                                                                                     |
| Statistical methods          | 12      | (a) Describe all statistical methods, including those used to control for confounding<br>(b) Describe any methods used to examine subgroups and interactions<br>(c) Explain how missing data were addressed<br>(d) <i>Cohort study</i> —If applicable, explain how loss to follow-up was addressed<br><i>Case-control study</i> —If applicable, explain how matching of cases and controls was addressed<br><i>Cross-sectional study</i> —If applicable, describe analytical methods taking account of sampling strategy<br>(e) Describe any sensitivity analyses                                                                                                                                |

Continued on next page

**Results**

|                  |     |                                                                                                                                                                                                                                                                                                                                                                                                               |
|------------------|-----|---------------------------------------------------------------------------------------------------------------------------------------------------------------------------------------------------------------------------------------------------------------------------------------------------------------------------------------------------------------------------------------------------------------|
| Participants     | 13* | (a) Report numbers of individuals at each stage of study—eg numbers potentially eligible, examined for eligibility, confirmed eligible, included in the study, completing follow-up, and analysed<br>(b) Give reasons for non-participation at each stage<br>(c) Consider use of a flow diagram                                                                                                               |
| Descriptive data | 14* | (a) Give characteristics of study participants (eg demographic, clinical, social) and information on exposures and potential confounders<br>(b) Indicate number of participants with missing data for each variable of interest<br>(c) <i>Cohort study</i> —Summarise follow-up time (eg, average and total amount)                                                                                           |
| Outcome data     | 15* | <i>Cohort study</i> —Report numbers of outcome events or summary measures over time<br><i>Case-control study</i> —Report numbers in each exposure category, or summary measures of exposure<br><i>Cross-sectional study</i> —Report numbers of outcome events or summary measures                                                                                                                             |
| Main results     | 16  | (a) Give unadjusted estimates and, if applicable, confounder-adjusted estimates and their precision (eg, 95% confidence interval). Make clear which confounders were adjusted for and why they were included<br>(b) Report category boundaries when continuous variables were categorized<br>(c) If relevant, consider translating estimates of relative risk into absolute risk for a meaningful time period |
| Other analyses   | 17  | Report other analyses done—eg analyses of subgroups and interactions, and sensitivity analyses                                                                                                                                                                                                                                                                                                                |

**Discussion**

|                  |    |                                                                                                                                                                            |
|------------------|----|----------------------------------------------------------------------------------------------------------------------------------------------------------------------------|
| Key results      | 18 | Summarise key results with reference to study objectives                                                                                                                   |
| Limitations      | 19 | Discuss limitations of the study, taking into account sources of potential bias or imprecision. Discuss both direction and magnitude of any potential bias                 |
| Interpretation   | 20 | Give a cautious overall interpretation of results considering objectives, limitations, multiplicity of analyses, results from similar studies, and other relevant evidence |
| Generalisability | 21 | Discuss the generalisability (external validity) of the study results                                                                                                      |

**Other information**

|         |    |                                                                                                                                                               |
|---------|----|---------------------------------------------------------------------------------------------------------------------------------------------------------------|
| Funding | 22 | Give the source of funding and the role of the funders for the present study and, if applicable, for the original study on which the present article is based |
|---------|----|---------------------------------------------------------------------------------------------------------------------------------------------------------------|

\*Give information separately for cases and controls in case-control studies and, if applicable, for exposed and unexposed groups in cohort and cross-sectional studies.

**Note:** An Explanation and Elaboration article discusses each checklist item and gives methodological background and published examples of transparent reporting. The STROBE checklist is best used in conjunction with this article (freely available on the Web sites of PLoS Medicine at <http://www.plosmedicine.org/>, Annals of Internal Medicine at <http://www.annals.org/>, and Epidemiology at <http://www.epidem.com/>). Information on the STROBE Initiative is available at [www.strobe-statement.org](http://www.strobe-statement.org).
